# Supplementary material for: Synthesis of mono-dispersed mesoporous silica spheres with highly ordered hexagonal regularity using conventional alkyltrimethylammonium halide as a surfactantElectronic supplementary information (ESI) available: time courses of particle size and scattering intensity of samples obtained with TEOS and C16TMACl. See http://www.rsc.org/suppdata/jm/b3/b313712k/
Source: Royal Society of Chemistry journal article supplement (doi:10.1039/b313712k), 2004-01-01
Supplement: b313712k.pdf [file b313712k.pdf]

ESI

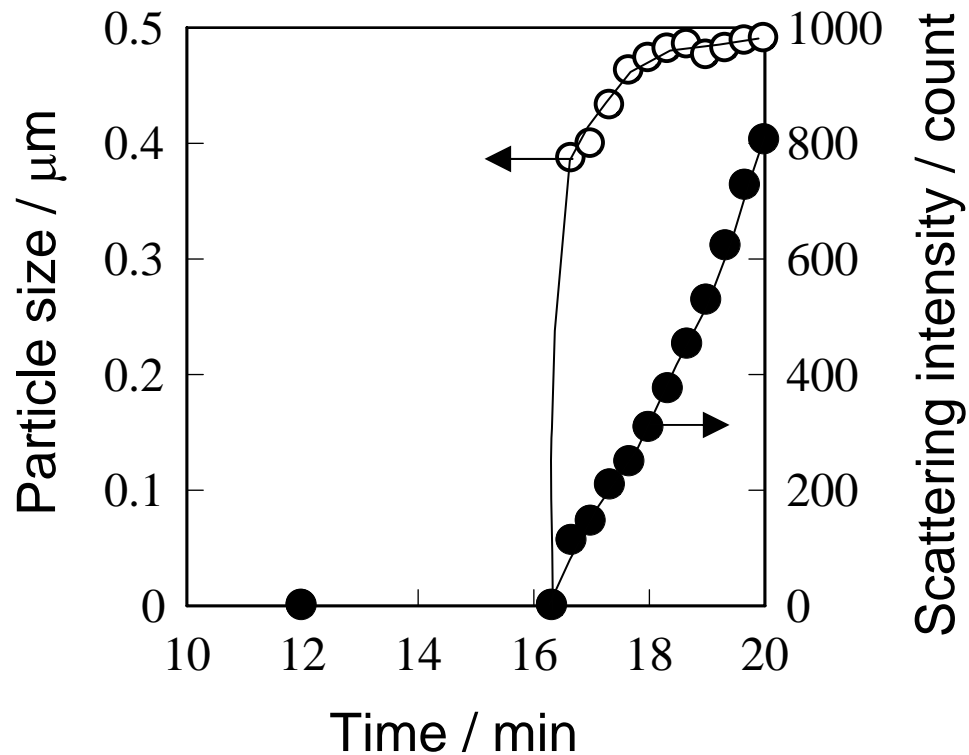

ESI. Time courses of particle size and scattering intensity of the sample synthesized with TEOS and  $C_{16}$ TMACl.
